# Supplementary material
Source: PubMed Central journal article supplement (PMC9387665)
Supplement: hcq-15-e008612-s001.pdf [file hcq-15-e008612-s001.pdf]

## **Supplemental Materials**

**Figure S1:** Flowchart demonstrating total number of observations available, excluded to due to missing values or hospitals having less than 10 patients, and final number of observations included in analysis

**Table S1.** Components of the Social Vulnerability Index

**Table S2.** Diagnosis Characteristics, Admission Features, and Laboratory Values for Patients Hospitalized with COVID-19 by County-Level Social Vulnerability Index Quartiles

**Table S3.** In-Hospital Mortality and Major Adverse Cardiovascular Events (MACE) of Patients Hospitalized with COVID-19 by County-Level Social Vulnerability Index Quartiles

**Table S4.** Odds Ratios of Clinical Outcomes by Per-Decile Increase in Subcomponents of Social Vulnerability Index Among Patients Hospitalized for COVID-19

**Table S5.** Association between County-Level Social Vulnerability and Clinical Outcomes by Time Period (January 14 to June 30, 2020 vs. July 1 to November 30, 2020)

**Table S6.** In-Hospital Treatment Patterns and Death Among COVID-19 Patients with Acute Coronary Syndromes by County-Level Social Vulnerability Quartiles

**Figure S1:** Flowchart demonstrating total number of observations available, excluded to due to missing values or hospitals having less than 10 patients, and final number of observations included in analysis

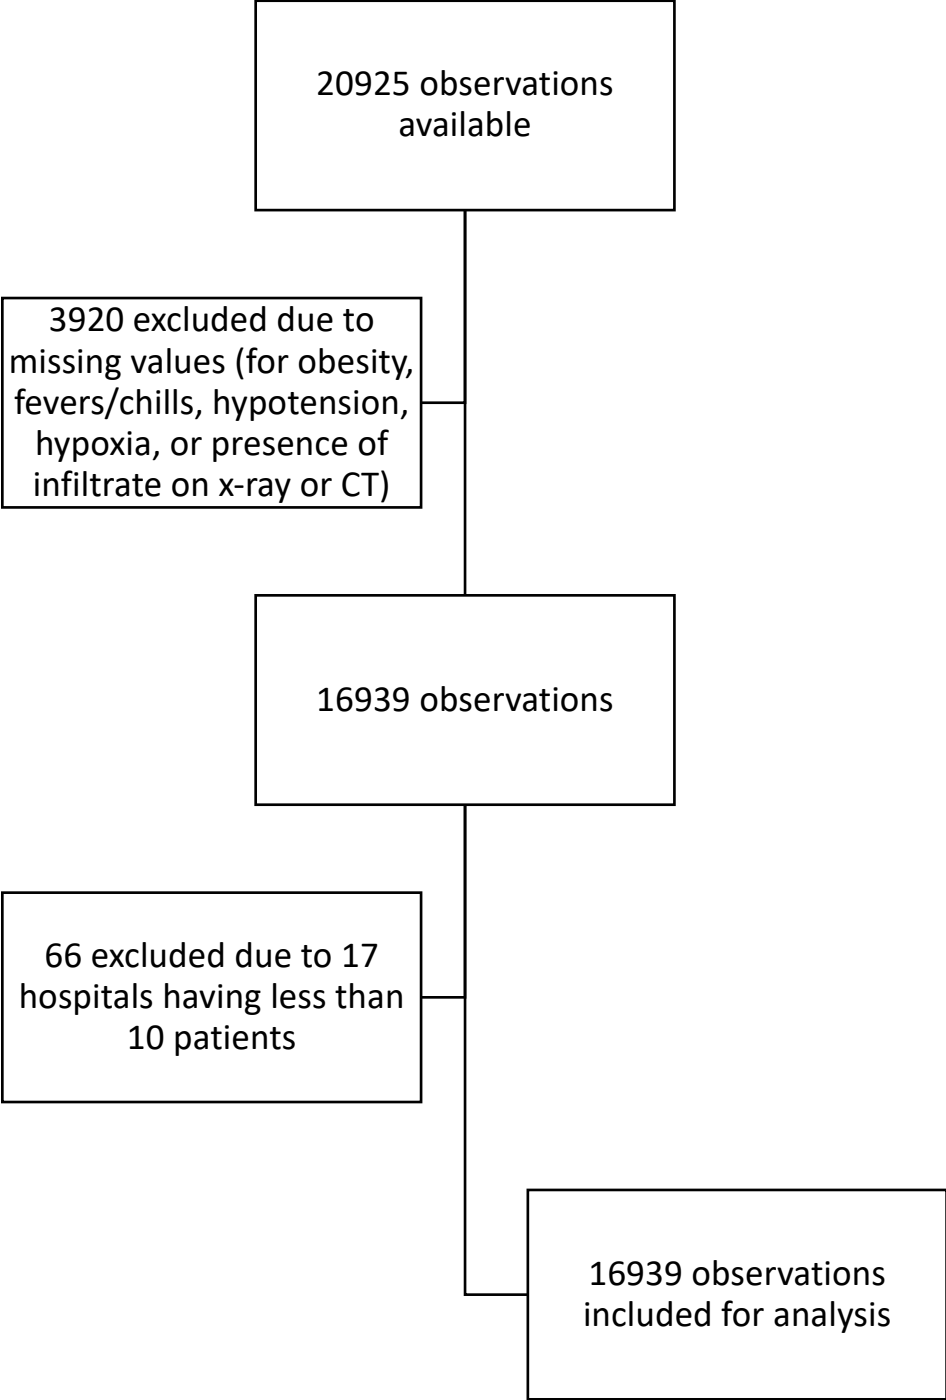

**Table S1.** Components of the Social Vulnerability Index

|                                             |                                                                                              |
|---------------------------------------------|----------------------------------------------------------------------------------------------|
| <b>Socioeconomic Status</b>                 | Below Poverty<br>Unemployed<br>Income<br>No High School Diploma                              |
| <b>Household composition and Disability</b> | Age 65 years or older<br>Age 17 years or younger<br>Older than Age 5 years with a Disability |
| <b>Minority Status and Language</b>         | Minority<br>Speak English “Less than Well”                                                   |
| <b>Housing Type and Transportation</b>      | Multi-Unit Structures<br>Mobile Homes<br>Crowding<br>No Vehicle<br>Group Quarters            |

**Table S2.** Diagnosis Characteristics, Admission Features, and Laboratory Values for Patients Hospitalized with COVID-19 by County-Level Social Vulnerability Index Quartiles

| Characteristic                                            | Quartile 1<br>(Least Vulnerable) | Quartile 2           | Quartile 3           | Quartile 4<br>(Most Vulnerable) | Overall                | p-value |
|-----------------------------------------------------------|----------------------------------|----------------------|----------------------|---------------------------------|------------------------|---------|
|                                                           | N=3168                           | N=3451               | N=5251               | N=5065                          | N=16935                |         |
| <b>Diagnosis and Hospital Presentation</b>                |                                  |                      |                      |                                 |                        |         |
| Days from symptoms onset to hospital arrival              | 7.0±6.8<br>(2691)                | 7.2±6.8<br>(2838)    | 6.8±6.7<br>(4466)    | 6.1±6.2<br>(4358)               | 6.7±6.6<br>(14353)     | <.001   |
| Days from symptom onset to diagnosis                      | 5.1±6.7<br>(2654)                | 4.7±6.3<br>(2800)    | 5.3±6.6<br>(4410)    | 5.0±6.4<br>(4302)               | 5.0±6.5<br>(14166)     | 0.009   |
| <b>Timing of COVID-19 diagnosis</b>                       |                                  |                      |                      |                                 |                        |         |
| Prior to hospital arrival                                 | 35.2%<br>(1115/3168)             | 48.9%<br>(1689/3455) | 33.5%<br>(1756/5249) | 29.7%<br>(1503/5065)            | 35.8%<br>(6063/16937)  | <.001   |
| During hospitalization                                    | 64.2%<br>(2035/3168)             | 49.9%<br>(1723/3455) | 64.8%<br>(3403/5249) | 69.5%<br>(3521/5065)            | 63.1%<br>(10682/16937) |         |
| After hospital discharge                                  | 0.5%<br>(16/3168)                | 0.9%<br>(30/3455)    | 1.3%<br>(67/5249)    | 0.6%<br>(28/5065)               | 0.8%<br>(141/16937)    |         |
| Unknown                                                   | 0.1%<br>(2/3168)                 | 0.4%<br>(13/3455)    | 0.4%<br>(23/5249)    | 0.3%<br>(13/5065)               | 0.3%<br>(51/16937)     |         |
| <b>Admission Features</b>                                 |                                  |                      |                      |                                 |                        |         |
| Fever                                                     | 57.7%<br>(1828/3168)             | 56.0%<br>(1935/3455) | 63.5%<br>(3336/5251) | 59.1%<br>(2994/5065)            | 59.6%<br>(10093/16939) | 0.002   |
| Tachycardia                                               | 37.2%<br>(1180/3168)             | 30.9%<br>(1066/3455) | 36.0%<br>(1890/5251) | 36.7%<br>(1857/5065)            | 35.4%<br>(5993/16939)  | 0.13    |
| Hypotension                                               | 2.1%<br>(67/3168)                | 2.1%<br>(73/3455)    | 2.7%<br>(141/5251)   | 2.5%<br>(127/5065)              | 2.4%<br>(408/16939)    | 0.12    |
| Hypoxia                                                   | 54.8%<br>(1737/3168)             | 62.6%<br>(2164/3455) | 50.6%<br>(2657/5251) | 50.2%<br>(2541/5065)            | 53.7%<br>(9099/16939)  | <.001   |
| Infiltrate on initial chest XRay/Computed Tomography (CT) | 69.7%<br>(2207/3168)             | 73.9%<br>(2554/3455) | 74.8%<br>(3928/5251) | 74.0%<br>(3747/5065)            | 73.4%<br>(12436/16939) | <.001   |
| <b>Laboratory Values</b>                                  |                                  |                      |                      |                                 |                        |         |
| White blood cell count on admission                       |                                  |                      |                      |                                 |                        |         |

|                          |                         |                         |                         |                         |                         |       |
|--------------------------|-------------------------|-------------------------|-------------------------|-------------------------|-------------------------|-------|
| N measured (%)           | 99.2%<br>(3143/3168)    | 98.8%<br>(3413/3455)    | 99.0%<br>(5197/5251)    | 99.2%<br>(5026/5065)    | 99.1%<br>(16779/16939)  | 0.54  |
| Measured value, K/uL     | 8.2±4.4<br>(3143)       | 8.1±4.3<br>(3413)       | 7.8±4.1<br>(5197)       | 7.9±4.2<br>(5026)       | 7.9±4.2<br>(16779)      | <.001 |
| C-reactive protein (CRP) |                         |                         |                         |                         |                         |       |
| N measured (%)           | 68.9%<br>(2182/3168)    | 45.0%<br>(1555/3455)    | 62.9%<br>(3304/5251)    | 63.8%<br>(3233/5065)    | 60.7%<br>(10274/16939)  | 0.009 |
| Measured value, mg/L     | 63.6±87.5<br>(2182)     | 91.1±110.4<br>(1555)    | 92.4±159.5<br>(3304)    | 80.6±97.9<br>(3233)     | 82.4±121.6<br>(10274)   | <.001 |
| D-dimer                  |                         |                         |                         |                         |                         |       |
| N measured (%)           | 34.2%<br>(1084/3168)    | 37.4%<br>(1293/3455)    | 42.5%<br>(2234/5251)    | 42.5%<br>(2153/5065)    | 39.9%<br>(6764/16939)   | <.001 |
| Measured value, ng/mL    | 1566.9±2822.3<br>(1084) | 2008.1±3430.5<br>(1293) | 1859.3±3549.3<br>(2234) | 1681.0±3463.0<br>(2153) | 1784.1±3394.4<br>(6764) | 0.004 |
| Pro-calcitonin           |                         |                         |                         |                         |                         |       |
| N measured (%)           | 62.6%<br>(1983/3168)    | 48.1%<br>(1663/3455)    | 62.2%<br>(3267/5251)    | 52.8%<br>(2676/5065)    | 56.6%<br>(9589/16939)   | <.001 |
| Measured value, ng/mL    | 1.2±6.9<br>(1983)       | 1.3±7.3<br>(1663)       | 1.4±7.2<br>(3267)       | 1.7±8.4<br>(2676)       | 1.4±7.5<br>(9589)       | 0.15  |

**Table S3.** In-Hospital Mortality and Major Adverse Cardiovascular Events (MACE) of Patients Hospitalized with COVID-19 by County-Level Social Vulnerability Index Quartiles

| Characteristic                   | Quartile 1          | Quartile 2          | Quartile 3          | Quartile 4           | Overall               | p-value |
|----------------------------------|---------------------|---------------------|---------------------|----------------------|-----------------------|---------|
|                                  | <b>N=3168</b>       | <b>N=3451</b>       | <b>N=5251</b>       | <b>N=5065</b>        | <b>N=16935</b>        |         |
| <b>In-hospital Mortality</b>     | 13.6%<br>(430/3168) | 12.5%<br>(431/3455) | 14.5%<br>(762/5251) | 16.9%<br>(855/5065)  | 14.6%<br>(2478/16939) | <.001   |
| Age < 55 years                   | 5.0%<br>(54/1080)   | 4.7%<br>(54/1154)   | 5.4%<br>(96/1762)   | 6.8%<br>(133/1945)   | 5.7%<br>(337/5941)    | 0.013   |
| Age 55 - 70 years                | 12.2%<br>(120/984)  | 10.3%<br>(119/1152) | 12.8%<br>(210/1645) | 17.6%<br>(282/1602)  | 13.6%<br>(731/5383)   | <.001   |
| Age > 70 years                   | 23.2%<br>(256/1104) | 22.5%<br>(258/1149) | 24.7%<br>(456/1844) | 29.0%<br>(440/1518)  | 25.1%<br>(1410/5615)  | <.001   |
| <b>MACE</b>                      | 16.1%<br>(510/3168) | 16.4%<br>(566/3455) | 18.3%<br>(959/5251) | 20.2%<br>(1024/5065) | 18.1%<br>(3059/16939) | <.001   |
| Acute Coronary Syndrome (all)    | 2.4%<br>(76/3168)   | 3.1%<br>(106/3455)  | 3.4%<br>(176/5251)  | 3.4%<br>(173/5065)   | 3.1%<br>(531/16939)   | 0.01    |
| NSTEMI                           | 0.3%<br>(8/3168)    | 0.2%<br>(8/3454)    | 0.4%<br>(20/5250)   | 0.3%<br>(15/5065)    | 0.3%<br>(51/16937)    | 0.16    |
| STEMI                            | 2.1%<br>(68/3168)   | 2.8%<br>(98/3454)   | 3.0%<br>(156/5250)  | 3.1%<br>(158/5065)   | 2.8%<br>(480/16937)   | 0.50    |
| Stroke                           | 1.3%<br>(40/3168)   | 1.4%<br>(50/3453)   | 1.4%<br>(72/5250)   | 1.5%<br>(75/5065)    | 1.4%<br>(237/16936)   | 0.50    |
| New-onset heart failure          | 1.0%<br>(31/3168)   | 1.7%<br>(58/3453)   | 1.6%<br>(82/5250)   | 1.2%<br>(62/5065)    | 1.4%<br>(233/16936)   | 0.67    |
| Myocarditis                      | 0.3%<br>(10/3168)   | 0.2%<br>(6/3453)    | 0.4%<br>(21/5250)   | 0.3%<br>(17/5064)    | 0.3%<br>(54/16935)    | 0.45    |
| Sustained Ventricular Arrhythmia | 1.3%<br>(42/3168)   | 1.2%<br>(42/3453)   | 1.0%<br>(54/5248)   | 1.0%<br>(52/5064)    | 1.1%<br>(190/16933)   | 0.16    |
| Cardiogenic Shock                | 0.8%<br>(24/3168)   | 0.6%<br>(22/3455)   | 0.7%<br>(36/5251)   | 0.5%<br>(25/5065)    | 0.6%<br>(107/16939)   | 0.18    |
| In-hospital cardiac arrest       | 3.2%<br>(100/3168)  | 2.8%<br>(98/3453)   | 4.4%<br>(233/5246)  | 7.1%<br>(359/5065)   | 4.7%<br>(790/16932)   | <.001   |

**Table S4.** Odds Ratios of Clinical Outcomes by Per-Decile Increase in Subcomponents of Social Vulnerability Index Among Patients Hospitalized for COVID-19

| Outcome                                           | Base Model (SVI)                   |             | Model 1 (Base + Age & Sex)  |             | Model 2 (Model 1 + Race)    |             | Model 3 (Model 2 + Insurance Status) |             | Model 4 (Model 3 + Past Medical History) |             | Model 5 (Model 4 + Clinical Features) |             |
|---------------------------------------------------|------------------------------------|-------------|-----------------------------|-------------|-----------------------------|-------------|--------------------------------------|-------------|------------------------------------------|-------------|---------------------------------------|-------------|
|                                                   | OR (95% CI)                        | p-value     | OR (95% CI)                 | p-value     | OR (95% CI)                 | p-value     | OR (95% CI)                          | p-value     | OR (95% CI)                              | p-value     | OR (95% CI)                           | p-value     |
| <b>In-hospital mortality</b>                      |                                    |             |                             |             |                             |             |                                      |             |                                          |             |                                       |             |
| <i>Socioeconomic Status</i>                       | <b>1.04</b><br>[0.99, 1.09]        | <b>0.11</b> | <b>1.06</b><br>[1.00, 1.11] | <b>0.02</b> | <b>1.06</b><br>[1.01, 1.11] | <b>0.02</b> | <b>1.06</b><br>[1.01, 1.05]          | <b>0.02</b> | <b>1.07</b><br>[1.01, 1.12]              | <b>0.01</b> | <b>1.07</b><br>[1.02, 1.12]           | <b>0.01</b> |
| <i>Household Composition &amp; Disability</i>     | 0.99<br>[0.95, 1.02]               | 0.63        | 1.00<br>[0.96, 1.04]        | 0.90        | 0.99<br>[0.96, 1.04]        | 0.88        | 1.00<br>[0.96, 1.04]                 | 0.80        | 0.99<br>[0.95, 1.03]                     | 0.63        | 0.99<br>[0.95, 1.03]                  | 0.49        |
| <i>Minority Status &amp; Language</i>             | 0.97<br>[0.93, 1.00]               | 0.10        | 1.00<br>[0.97, 1.04]        | 0.90        | 1.00<br>[0.96, 1.04]        | 0.94        | 1.00<br>[0.97, 1.04]                 | 0.83        | 1.01<br>[0.97, 1.05]                     | 0.61        | 1.02<br>[0.98, 1.06]                  | 0.35        |
| <i>Housing Type &amp; Transport</i>               | 0.99<br>[0.96, 1.03]               | 0.96        | 0.98<br>[0.95, 1.02]        | 0.28        | 1.00<br>[0.98, 1.03]        | 0.25        | 0.98<br>[0.94, 1.01]                 | 0.20        | 0.97<br>[0.94, 1.01]                     | 0.14        | 0.97<br>[0.94, 1.01]                  | 0.24        |
| <b>Major Adverse Cardiovascular Events (MACE)</b> |                                    |             |                             |             |                             |             |                                      |             |                                          |             |                                       |             |
| Socioeconomic Status                              | 1.02<br>[0.98, 1.06]               | 0.50        | 1.03<br>[0.99, 1.08]        | 0.17        | 1.03<br>[0.99, 1.08]        | 0.17        | 1.03<br>[0.99, 1.08]                 | 0.16        | 1.03<br>[0.99, 1.08]                     | 0.13        | 1.04<br>[0.99, 1.09]                  | 0.12        |
| Household Composition & Disability                | 1.01<br>[0.97, 1.05]               | 0.48        | 1.02<br>[0.99, 1.06]        | 0.26        | 1.02<br>[0.98, 1.06]        | 0.28        | 1.02<br>[0.98, 1.06]                 | 0.33        | 1.02<br>[0.98, 1.06]                     | 0.44        | 1.01<br>[0.97, 1.05]                  | 0.62        |
| Minority Status & Language                        | <b>0.96</b><br><b>[0.93, 0.99]</b> | <b>0.01</b> | 0.99<br>[0.95, 1.02]        | 0.44        | 0.99<br>[0.95, 1.02]        | 0.39        | 0.99<br>[0.95, 1.02]                 | 0.46        | 0.99<br>[0.96, 1.03]                     | 0.60        | 1.00<br>[0.96, 1.03]                  | 0.86        |

|                               |                         |      |                         |      |                         |      |                         |      |                         |      |                         |      |
|-------------------------------|-------------------------|------|-------------------------|------|-------------------------|------|-------------------------|------|-------------------------|------|-------------------------|------|
| Housing Type<br>and Transport | 1.01<br>[0.98,<br>1.05] | 0.43 | 1.00<br>[0.96,<br>1.03] | 0.77 | 0.99<br>[0.96,<br>1.03] | 0.69 | 0.99<br>[0.96,<br>1.02] | 0.60 | 0.99<br>[0.96,<br>1.02] | 0.49 | 0.99<br>[0.96,<br>1.03] | 0.73 |
|-------------------------------|-------------------------|------|-------------------------|------|-------------------------|------|-------------------------|------|-------------------------|------|-------------------------|------|



**Table S5.** Association between County-Level Social Vulnerability and Clinical Outcomes by Time Period (January 14 to June 30, 2020 vs. July 1 to November 30, 2020)

|                                                   | <b>Demographics + insurance status</b> | <b>Demographics, Insurance + Comorbidities</b> | <b>Demographics, Insurance, Comorbidities + Clinical Features</b> | <b>P value for interaction term</b> |
|---------------------------------------------------|----------------------------------------|------------------------------------------------|-------------------------------------------------------------------|-------------------------------------|
| <b>In-hospital Mortality</b>                      |                                        |                                                |                                                                   |                                     |
| Q2 vs. Q1 before July 1                           | 1.222 [0.952, 1.568]                   | 1.176 [0.915, 1.512]                           | 1.067 [0.825, 1.379]                                              | 0.039                               |
| Q3 vs. Q1 before July 1                           | 1.210 [0.974, 1.503]                   | 1.174 [0.944, 1.461]                           | 1.165 [0.932, 1.456]                                              |                                     |
| Q4 vs. Q1 before July 1                           | 1.284 [1.024, 1.609]                   | 1.248 [0.994, 1.566]                           | 1.232 [0.976, 1.556]                                              |                                     |
| Q2 vs. Q1 since July 1                            | 0.767 [0.551, 1.069]                   | 0.764 [0.548, 1.067]                           | 0.808 [0.574, 1.138]                                              |                                     |
| Q3 vs. Q1 since July 1                            | 0.757 [0.526, 1.089]                   | 0.759 [0.526, 1.094]                           | 0.755 [0.519, 1.099]                                              |                                     |
| Q4 vs. Q1 since July 1                            | 1.220 [0.873, 1.704]                   | 1.236 [0.883, 1.731]                           | 1.277 [0.903, 1.806]                                              |                                     |
| <b>Major Adverse Cardiovascular Events (MACE)</b> |                                        |                                                |                                                                   |                                     |
| Q2 vs. Q1 before July 1                           | 1.267 [0.893, 1.798]                   | 1.257 [0.886, 1.784]                           | 1.203 [0.846, 1.709]                                              | 0.705                               |
| Q3 vs. Q1 before July 1                           | 1.102 [0.806, 1.508]                   | 1.085 [0.793, 1.485]                           | 1.082 [0.790, 1.481]                                              |                                     |
| Q4 vs. Q1 before July 1                           | 1.167 [0.842, 1.617]                   | 1.159 [0.836, 1.606]                           | 1.136 [0.819, 1.576]                                              |                                     |
| Q2 vs. Q1 since July 1                            | 0.912 [0.605, 1.377]                   | 0.933 [0.618, 1.410]                           | 0.948 [0.626, 1.436]                                              |                                     |
| Q3 vs. Q1 since July 1                            | 0.869 [0.572, 1.319]                   | 0.887 [0.584, 1.349]                           | 0.882 [0.579, 1.343]                                              |                                     |
| Q4 vs. Q1 since July 1                            | 1.073 [0.716, 1.609]                   | 1.094 [0.729, 1.641]                           | 1.088 [0.724, 1.635]                                              |                                     |

Demographic variables included in the model: age, sex, and race/ethnicity

**Table S6.** In-Hospital Treatment Patterns and Death Among COVID-19 Patients with Acute Coronary Syndromes by County-Level Social Vulnerability Index Quartiles

|                                                                     | <b>Quartile 1<br/>(Least<br/>Vulnerable)</b> | <b>Quartile<br/>2</b> | <b>Quartile<br/>3</b> | <b>Quartile 4<br/>(Most<br/>Vulnerable)</b> | <b>Overall</b>     | <b>p-<br/>value</b> |
|---------------------------------------------------------------------|----------------------------------------------|-----------------------|-----------------------|---------------------------------------------|--------------------|---------------------|
|                                                                     | N=76                                         | N=106                 | N=176                 | N=173                                       | N=531              |                     |
| <b>Treatment</b>                                                    |                                              |                       |                       |                                             |                    |                     |
| Invasive Coronary<br>Angiogram                                      | 11.8%<br>(9/76)                              | 4.7%<br>(5/106)       | 8.0%<br>(14/176)      | 8.7%<br>(15/173)                            | 8.1%<br>(43/531)   | 0.86                |
| Revascularization<br>(percutaneous<br>coronary<br>intervention/PCI) | 9.2% (7/76)                                  | 3.8%<br>(4/106)       | 6.3%<br>(11/176)      | 7.5%<br>(13/173)                            | 6.6%<br>(35/531)   | 0.92                |
| <b>In-hospital<br/>mortality</b>                                    | 40.8%<br>(31/76)                             | 23.6%<br>(25/106)     | 33.5%<br>(59/176)     | 39.3%<br>(68/173)                           | 34.5%<br>(183/531) | 0.36                |
